# Supplementary material for: MEIS-1 level in unresectable hepatocellular carcinoma can predict the post-treatment outcomes of radiofrequency ablation
Source: PubMed Central journal article supplement (PMC5880601; doi:10.18632/oncotarget.24165), 2018-01-11
Supplement: oncotarget-09-15252-s001.pdf [file oncotarget-09-15252-s001.pdf]

## MEIS-1 level in unresectable hepatocellular carcinoma can predict the post-treatment outcomes of radiofrequency ablation

### SUPPLEMENTARY MATERIALS

**Supplementary Table 1: The primers used in this work**

| Genes      | Primer sequence (5'-3')                |
|------------|----------------------------------------|
| MEIS-1     | Forward: 5'-TCCCAA AGTAGCCACCAATATC-3' |
|            | Reverse: 5'-CTGTATCTGTGCCAAC TGCTT-3'  |
| E-cadherin | Forward: 5'-AAGGCACGCCTGTCGAAGCA-3'    |
|            | Reverse: 5'-ACGTTGTCCCGGGTGTTCATCCT-3' |
| N-cadherin | Forward: 5'-TGCGCGTGAAGGTTTGCCAGT-3'   |
|            | Reverse: 5'-TGGCGTTCTTTATCCCGGCGT-3'   |
| Vimentin   | Forward: 5'-ACCGCACACAGCAAGGCGAT-3'    |
|            | Reverse: 5'-CGATTGAGGGCTCCTAGCGGTT-3'  |

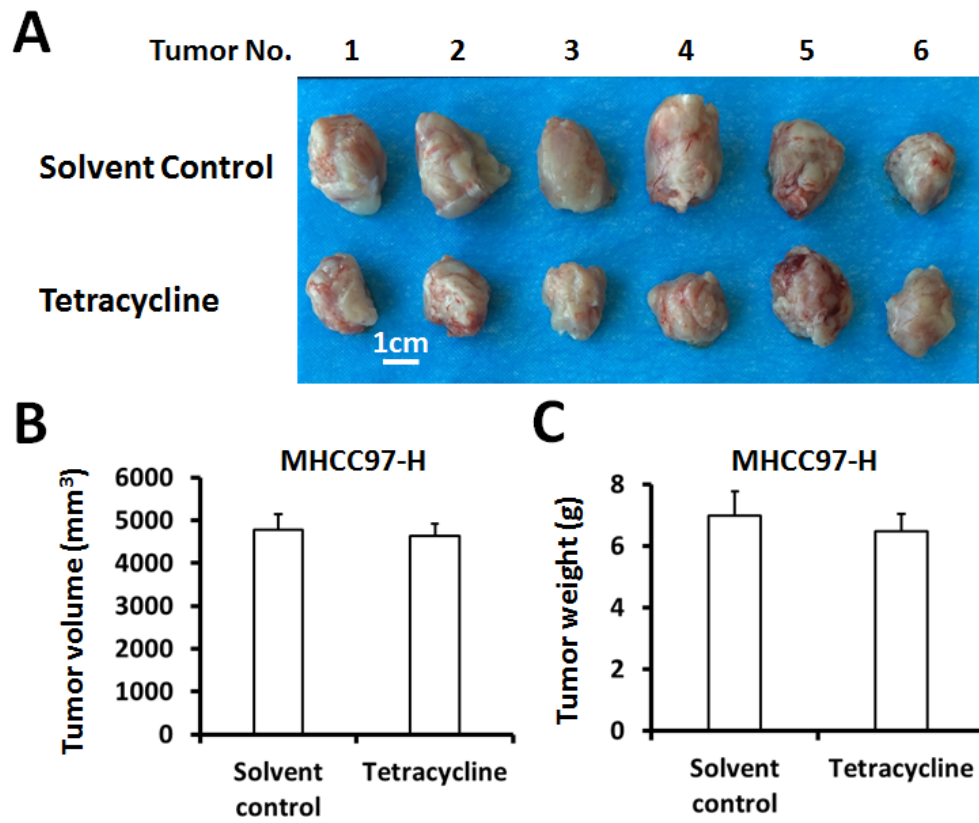

**Supplementary Figure 1: The effect of tetracycline on HCC cells' subcutaneous growth.** (A) MHCC97-H cells were seeded in nude mice. When the tumoral volume reached 1000-1200 mm<sup>3</sup>, Mice were received solvent control or tetracycline per day. After 2-4 weeks' growth, tumoral growth was defined as the tumoral volume (B) and tumoral weight (C).
